# Supplementary material for: Epiphyte type and sampling height impact mesofauna communities in Douglas-fir trees
Source: PeerJ. 2018 Oct 12;6:e5699. doi: 10.7717/peerj.5699 (PMC6187993; doi:10.7717/peerj.5699)
Supplement: Table S1 — This list details the epiphyte species found in the canopy of nine Douglas-fir trees in Six River’s National Park across three sampling heights. [file peerj-06-5699-s002.xlsx]

## Sheet: Sheet1
Supplementary Table 1. Stratification of epiphyte species at three sampling heights
Epiphyte Type Epiphyte Species		low	mid	top	Total
Bryophyte
	Dicranum howellii	2	1	0	3
	Isothecium myosuroides	2	0	0	2
	Cephalozia bicuspidata	0	1	0	1
	Dicranowesia cirrata	1	0	0	1
	Hypnus circinale	1	0	0	1
	Orthodicranum tauricum	0	1	0	1
	Radula bolanderi	0	0	1	1
	Porella navicularis	0	1	0	1
	Not identified	3	0	0	3
	Bryophyte Total	9	4	1	14
Foliose lichen
	Hypogymnia inactiva	0	3	4	7
	Hypogymnia enteromorpha	1	1	2	4
	Platismatia glauca	2	1	1	4
	Platismatia herrei	3	1	0	4
	Not identified	1	1	1	3
	Foliose Total	7	7	8	22
Fruticose lichen
	Usnea scabrata	2	5	3	10
	Usnea filipendula	1	3	0	4
	Sphaerophorus tuckermanii	0	2	0	2
	Sphaerophorus venerabilis	1	0	0	1
	Usnea subforidana	0	0	1	1
	Not identified	4	1	4	9
	Fruticose Total	8	11	8	27
	Total	24	22	17
